# Supplementary material for: Trade-offs and Noise Tolerance in Signal Detection by Genetic Circuits
Source: PubMed Central journal article supplement (PMC2928721; doi:10.1371/journal.pone.0012314), 2010-08-26
Supplement: pone.0012314.s011.pdf [file pone.0012314.s011.pdf]

**Table S1:** Definition of frequency detection parameters and corresponding susceptibility ranges for simple network motifs.

| <i>Network motif</i>              | <i>Frequency parameter</i>                                                  | <i>Maximum susceptibility</i>                                                                         | <i>Minimum susceptibility</i>                                                                         |
|-----------------------------------|-----------------------------------------------------------------------------|-------------------------------------------------------------------------------------------------------|-------------------------------------------------------------------------------------------------------|
| Negative feedback                 | Feedback strength( $FS$ ) <sup>1</sup><br>$FS \equiv  s_{OS} \cdot s_{SO} $ | $s_O^{max} = \frac{smax \cdot s_{SI}^*}{1+FS}$                                                        | $s_O^{min} = \max\left(\frac{FS \cdot s_{SI}^*}{smax(1+FS)}, \frac{smin \cdot s_{SI}^*}{1+FS}\right)$ |
| Positive feedback                 | Feedback strength( $FS$ ) <sup>2</sup><br>$FS \equiv  s_{OS} \cdot s_{SO} $ | $s_O^{max} = \frac{smax \cdot s_{SI}^*}{1-FS}$                                                        | $s_O^{min} = \max\left(\frac{FS \cdot s_{SI}^*}{smax(1-FS)}, \frac{smin \cdot s_{SI}^*}{1-FS}\right)$ |
| Negative autoregulation on output | Autoregulation strength( $ARS$ ) <sup>3</sup><br>$ARS \equiv  H_{OO} - 1 $  | $s_O^{max} = \frac{smax \cdot s_{SI}^*}{1+ARS}$                                                       | $s_O^{min} = \frac{smin \cdot s_{SI}^*}{1+ARS}$                                                       |
| Positive autoregulation on output | Autoregulation strength( $ARS$ )<br>$ARS \equiv  H_{OO} - 1 $               | $s_O^{max} = \frac{smax \cdot s_{SI}^*}{1-ARS}$                                                       | $s_O^{min} = \frac{smin \cdot s_{SI}^*}{1-ARS}$                                                       |
| Incoherent FFL <sup>4</sup>       | Relative strength( $RS$ )<br>$RS \equiv \left \frac{s_{OI}}{s_O}\right $    | $s_O^{max} = s_{OI} + smax \cdot s_{SI}^*$ <sup>5</sup><br>$s_O^{max} = \frac{smax}{RS}$ <sup>6</sup> | $s_O^{min} = \frac{smin \cdot s_{SI}^*}{1+RS}$                                                        |
| Coherent FFL <sup>7</sup>         | Relative strength( $RS$ )<br>$RS \equiv \left \frac{s_{OI}}{s_O}\right $    | $s_O^{max} = s_{OI} + smax \cdot s_{SI}^*$ <sup>8</sup><br>$s_O^{max} = \frac{smax}{RS}$ <sup>9</sup> | $s_O^{min} = \frac{smin \cdot s_{SI}^*}{1-RS}$                                                        |

<sup>1</sup> Maximum FS= $smax \cdot smax$ .

<sup>2</sup> Maximum FS=1, otherwise the output steady state is unstable.

<sup>3</sup> For no autoregulation,  $H_{OO} = 1$ . For positive autoregulation,  $0 < H_{OO} < 1$ . For negative autoregulation,  $H_{OO} > 1$ .

<sup>4</sup> Here we analyze the type 3 Incoherent FFL,  $s_{OI} < 0$ , with input/sensor and sensor/output interactions positive as in the rest of the circuits.

<sup>5</sup> For  $RS < \frac{1}{s_{SI}^* - 1}$ ,  $s_{OS} = smax$  and  $s_O^{max}$  decreases as  $s_{OI}$  changes in the interval  $[0, -smax]$ .

<sup>6</sup> For  $RS > \frac{1}{s_{SI}^* - 1}$ ,  $s_{OI} = -smax$  and  $s_O^{max}$  decreases as  $s_{OS}$  changes in the interval  $[smax, 0]$ .

<sup>7</sup> Here we analyze the type I Coherent FFL,  $s_{OI} > 0$  with input/sensor and sensor/output interactions positive.

<sup>8</sup> For  $RS < \frac{1}{1+s_{SI}^*}$ ,  $s_{OS} = smax$  and  $s_O^{max}$  increases as  $s_{OI}$  changes in the interval  $[0, smax]$ .

<sup>9</sup> For  $RS > \frac{1}{1+s_{SI}^*}$ ,  $s_{OI} = smax$  and  $s_O^{max}$  decreases as  $s_{OS}$  changes in the interval  $[smax, 0]$ .
